# Supplementary material for: Fine Mapping of qAL5.2 Controlling Anther Length in Oryza sativa
Source: MDPI journal article supplement (doi:10.3390/plants13081130), 2024-04-18
Supplement: s1 [file s1]

## Supplemental information

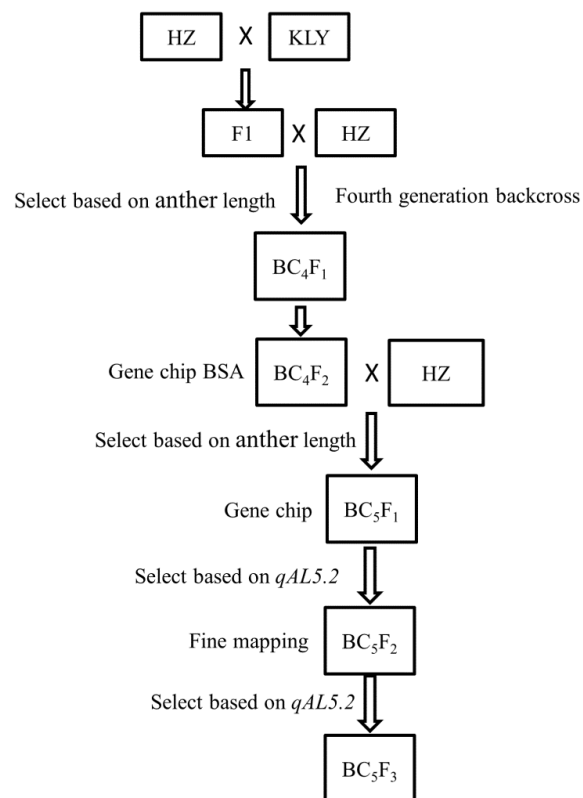

**Figure S1.** Development of advanced backcross lines.

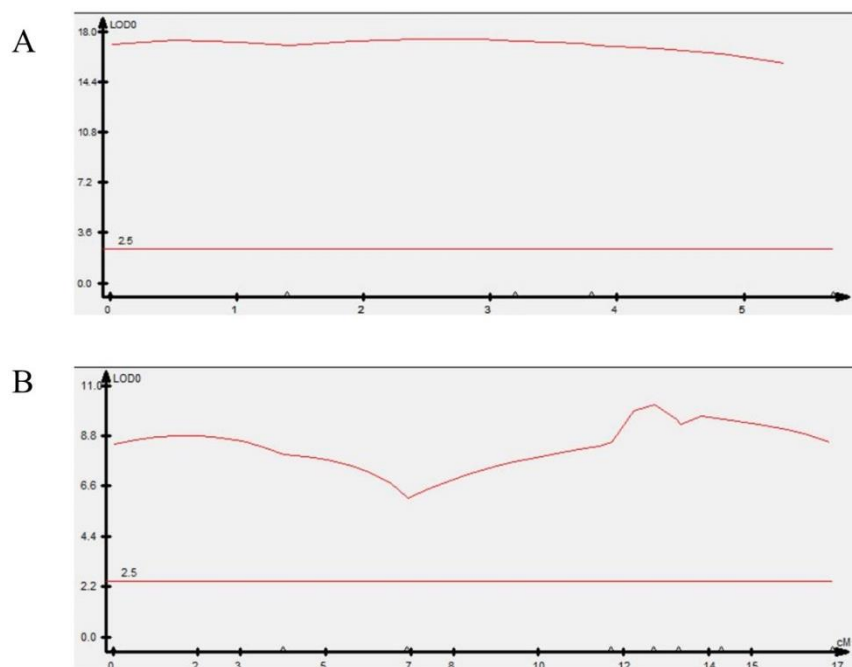

**Figure S2.** The LOD score plots by WinQTLCart. (A) The LOD score of LY2 population. (B) The LOD score of LY3 population.

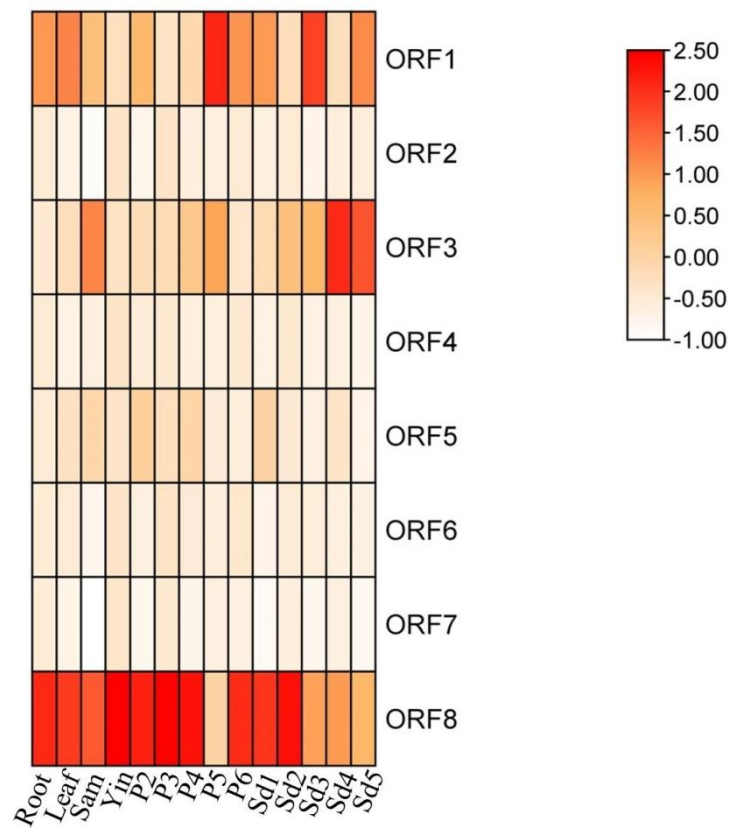

**Figure S3.** The expression profiles of the candidate genes in different tissues ([Rice eFP Browser \(utoronto.ca\)](#)).

**Table S1.** Anther length of populations

| population | Average | Maximum | Minimum |
|------------|---------|---------|---------|
| LY-1       | 2.03    | 2.32    | 1.74    |
| LY-2       | 2.19    | 2.51    | 1.7     |
| LY-3       | 2.2     | 2.5     | 1.94    |
| LY-4       | 2.12    | 2.33    | 1.85    |
| LY-5       | 2.15    | 2.39    | 1.86    |
| LY-6       | 2.26    | 2.46    | 2.04    |
| LY-7       | 2.15    | 2.43    | 1.79    |

**Table S2. Prime list**

| Prime name | Forward prime sequence (5'-3') | Reverse prime sequence(5'-3') |
|------------|--------------------------------|-------------------------------|
| HK134      | TGAAAGCCAGGAAGCATA             | GAATGTGGGCAATGCTAG            |
| HK03       | TATGCCGCCACCTTGTCT             | ATAGGCGGCGTTCGTGTC            |
| HK136      | AAGGATAGGCAGCGTGAA             | GGCTTTGGTGGACAACCTTA          |
| HK58       | TCAGTTCCACATAAATAAG            | ACCACAATGCCCAATAGA            |
| HK138      | TGCTGGTTATCCATAGGTC            | CATCGTCGTTATTAAGGGT           |
| HK139      | ATTGTGTACGACAGTTTGAATAAGT      | ACAGTTGAAGGCAGGAGG            |
| HK140      | CTGTTGACTGCTGTGCCTAT           | TTGGGAGTATTTGAACAGG           |
| HK61       | ATCCCTGTATCTGGGTAACGT          | TTTGCCCAAACCAAGATC            |
| HK62       | GCCAAAGAAACAACGACC             | CTCCAGAGCCAGCAGATT            |
| pAN580-O   | GCCCAGATCAACTAGTATGCCTCGCCTC   | TCGAGACGTCTCTAGAGAACGCACCTCG  |
| RF3        | CACCTCCT                       | CAGTCGCA                      |
| pAN580-O   | GCCCAGATCAACTAGT               | TCGAGACGTCTCTAGACATCCTACATTGC |
| RF8        | ATGACAAAGGAGATGGCCGA           | TGGGGAT                       |
| seq-ORF3   | GTGTTTTATTATCTTTTAATT          | CACCTTGAGAACAAGAATCCGT        |
| seq-ORF8   | CAGTCCTGGTTGCGTCTC             | TGGGTGGGAGCCAAAGAT            |
